# Supplementary material
Source: HighWire-hosted journal article supplement (https://bmjopen.bmj.com/content/13/9/e075715)
Supplement: inline-supplementary-material-4 [file inline-supplementary-material-4.pdf]

### The data collection table

Use a 10cm VAS scale with a moving scale between 0 and 10 on the front and a number from 0 to 10 on the back, with 0 being no pain and 10 being the most painful. Please state your pain level according to the following scale.

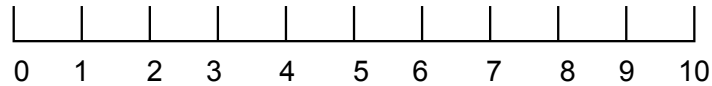

VAS scale (0-10 points)

0: no pain; 1-3: light pain; 4-6: moderate pain; 7-10: severe and unbearable pain.

| Projects       | Before treatment | Treatment |      |      |      |       |
|----------------|------------------|-----------|------|------|------|-------|
|                | 0min             | 2min      | 4min | 6min | 8min | 10min |
| pain VAS score |                  |           |      |      |      |       |
