# Supplementary material
Source: HighWire-hosted journal article supplement (https://bmjopen.bmj.com/content/13/9/e075715)
Supplement: inline-supplementary-material-5 [file inline-supplementary-material-5.pdf]

Blinding test

|                                                                                                         |                                                          |
|---------------------------------------------------------------------------------------------------------|----------------------------------------------------------|
| Do you think you were given acupuncture treatment or placebo acupuncture?                               | Yes <input type="checkbox"/> No <input type="checkbox"/> |
| How sure are you on your answer on a scale of 0 to 10? (0 = very uncertain and 10 = completely certain) | <input type="text"/>                                     |

Treatment Expectations Scale

|                                                                                                         |                                                                             |
|---------------------------------------------------------------------------------------------------------|-----------------------------------------------------------------------------|
| What do you think of the results of your treatment?                                                     | Efficiently <input type="checkbox"/> Inefficiently <input type="checkbox"/> |
| How sure are you on your answer on a scale of 0 to 10? (0 = very uncertain and 10 = completely certain) | <input type="text"/>                                                        |
